# Supplementary material
Source: publisher figshare collection journal article supplement (https://gsajournals.figshare.com/ndownloader/files/13806443)
Supplement: Supplementary file 1 [file 13806443]

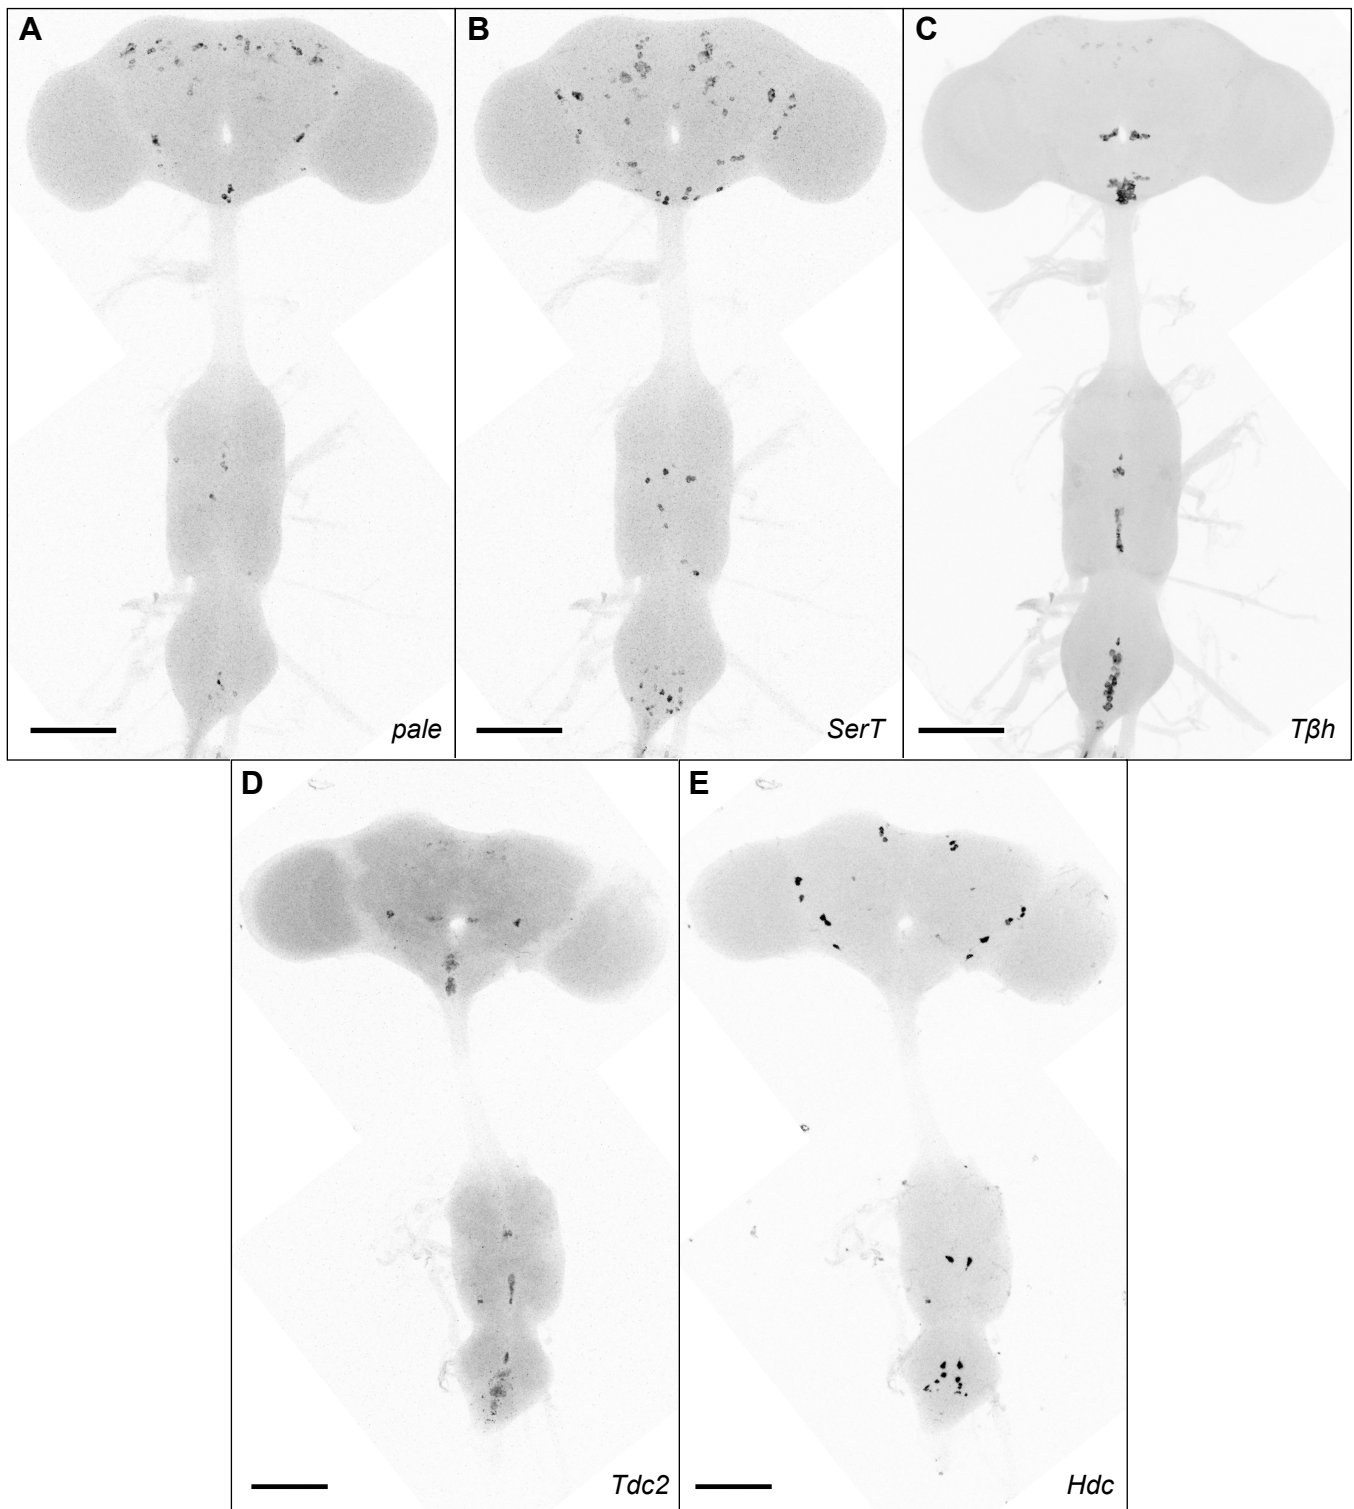

**Figure S1.** Detection of dopaminergic, serotonergic, tyraminerpic, octopaminergic and histaminergic neurons in whole-mount *Drosophila* CNS using FISH. (A-E) Confocal images of *TH/pale*, *SerT*, *Tβh*, *Tdc2*, and *Hdc* expression patterns in the CNS. Samples were imaged with a 20x objective and intensity values were inverted. Scale bars, 100 μm.
